# Supplementary material
Source: PubMed Central journal article supplement (PMC5389115)
Supplement: NIHMS849813-supplement.pdf [file NIHMS849813-supplement.pdf]

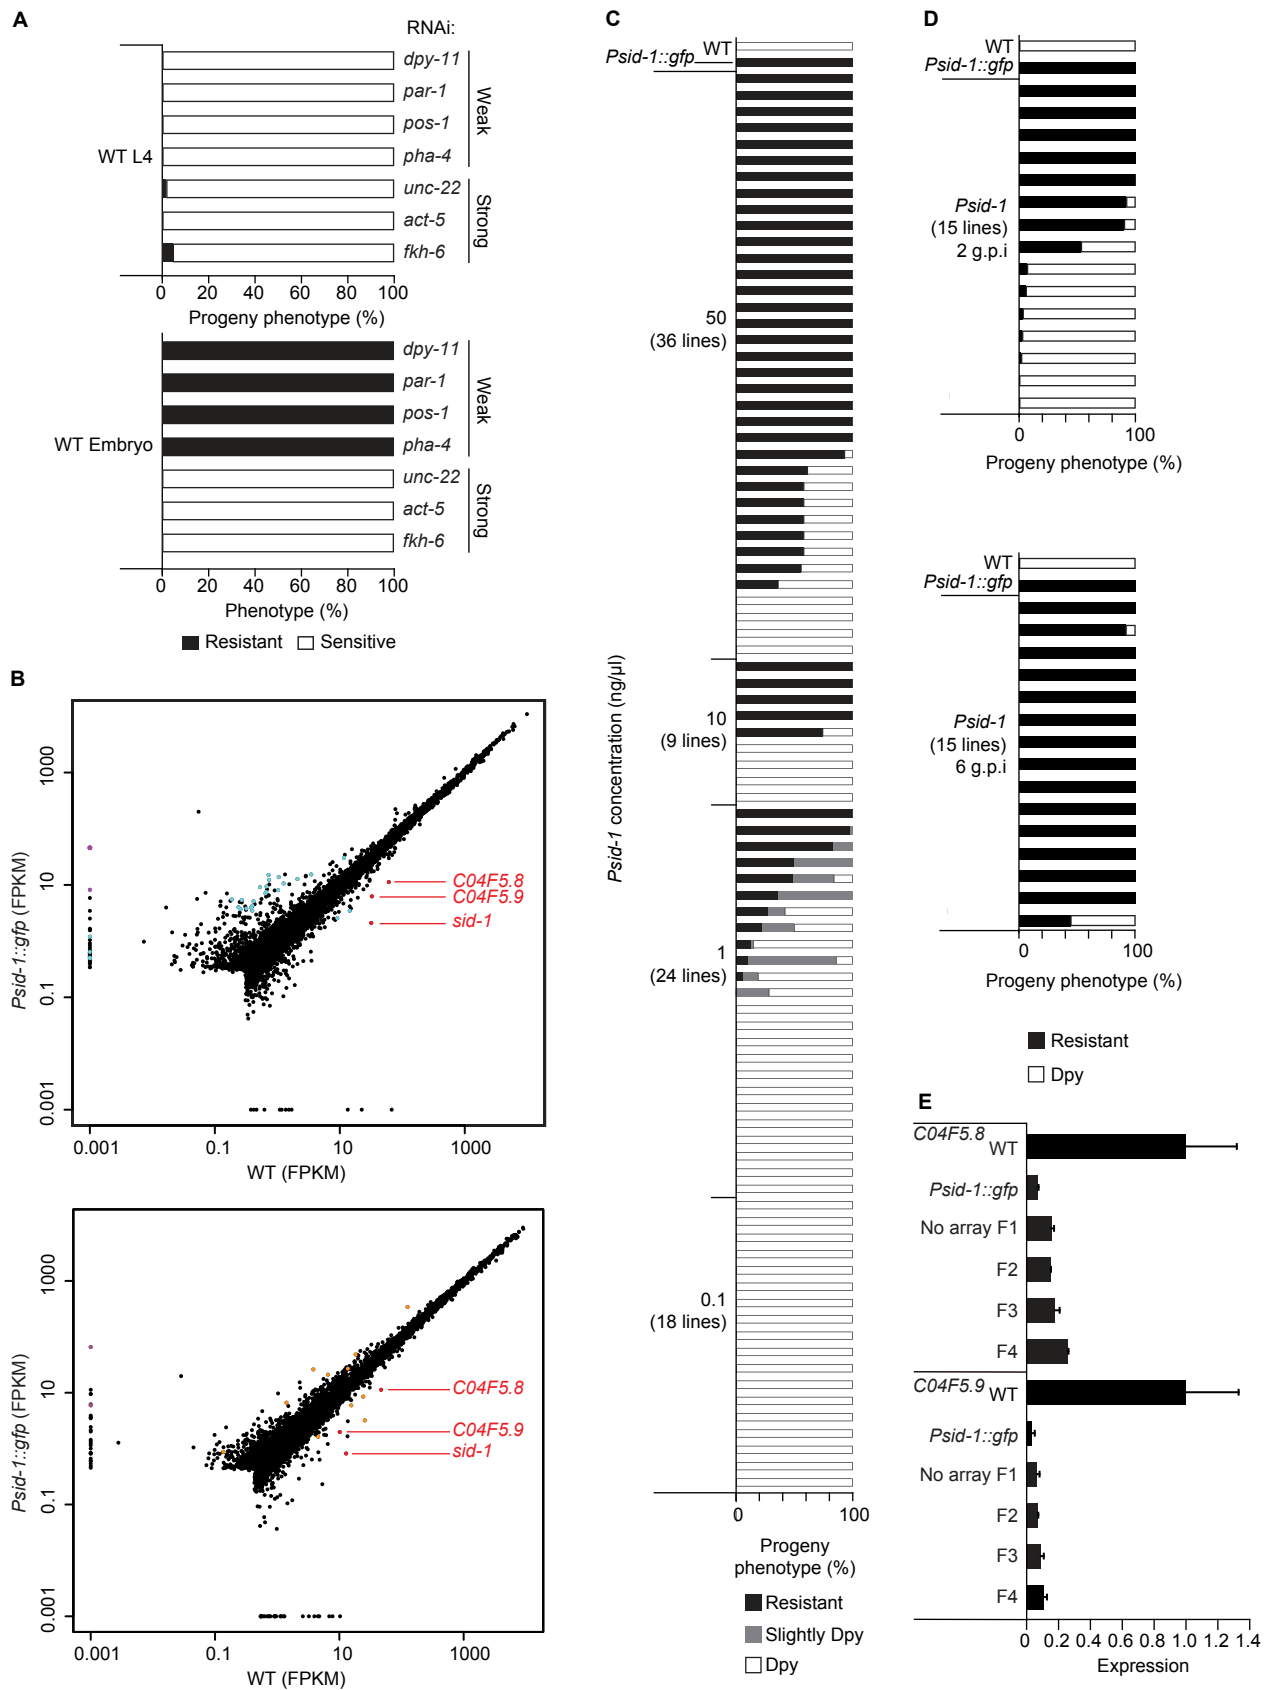

**Figure S1. Related to Figure 1. (A)** Phenotype of WT adults exposed to weak or strong RNAi foods as embryos (at least 50) or progeny of WT L4 worms (average of 91) placed on RNAi foods. **(B)** Gene expression (FPKM) for WT and *Psid-1::gfp* young adult mRNA-seq libraries that maintained strand-specific information (bottom, 2 replicates per strain) and two libraries that did not (top, 2 replicates per strain). Genes significantly (FDR < 0.05) downregulated (red) or upregulated (purple) in *Psid-1::gfp* in both experiments are highlighted. Genes differentially expressed in only one experiment are in blue and orange. The two genes upregulated in both experiments (*srbc-15*, *F56A4.3*) are unlikely to be biologically relevant to the phenotype of interest because both have many paralogs and reads aligning to *srbc-15* do not align to the whole gene, indicating that they are likely misaligned. Only genes tested for significance are shown. **(C)** Data used to generate Figure 1F. Each bar represents the RNAi sensitivity of the progeny of 3 L4 worms from each line fed *dpy-11* RNAi. Progeny were scored as adults. **(D)** Transgenic lines produced by injected *sid-1* promoter ("*Psid-1*", injected at 25-75ng/ $\mu$ l) scored on *dpy-11* RNAi two or six generations post injection (g.p.i.). Each bar represents the RNAi sensitivity of the adult progeny (average of 55 per line) of three L4 larvae from each independent line fed *dpy-11* RNAi. Line order is the same for both graphs. **(E)** Quantitative reverse transcription (qRT)-PCR analysis of *C04F5.8*, *C04F5.9* mRNA levels in single young adult wild-type, *Ex[Psid-1::gfp]*, and non-array worms segregated from *Ex[Psid-1::gfp]*. Expression is measured relative to *cpf-1* and wild-type expression is set to 1.0. Average of two worms and two technical replicates  $\pm$  SD is shown.

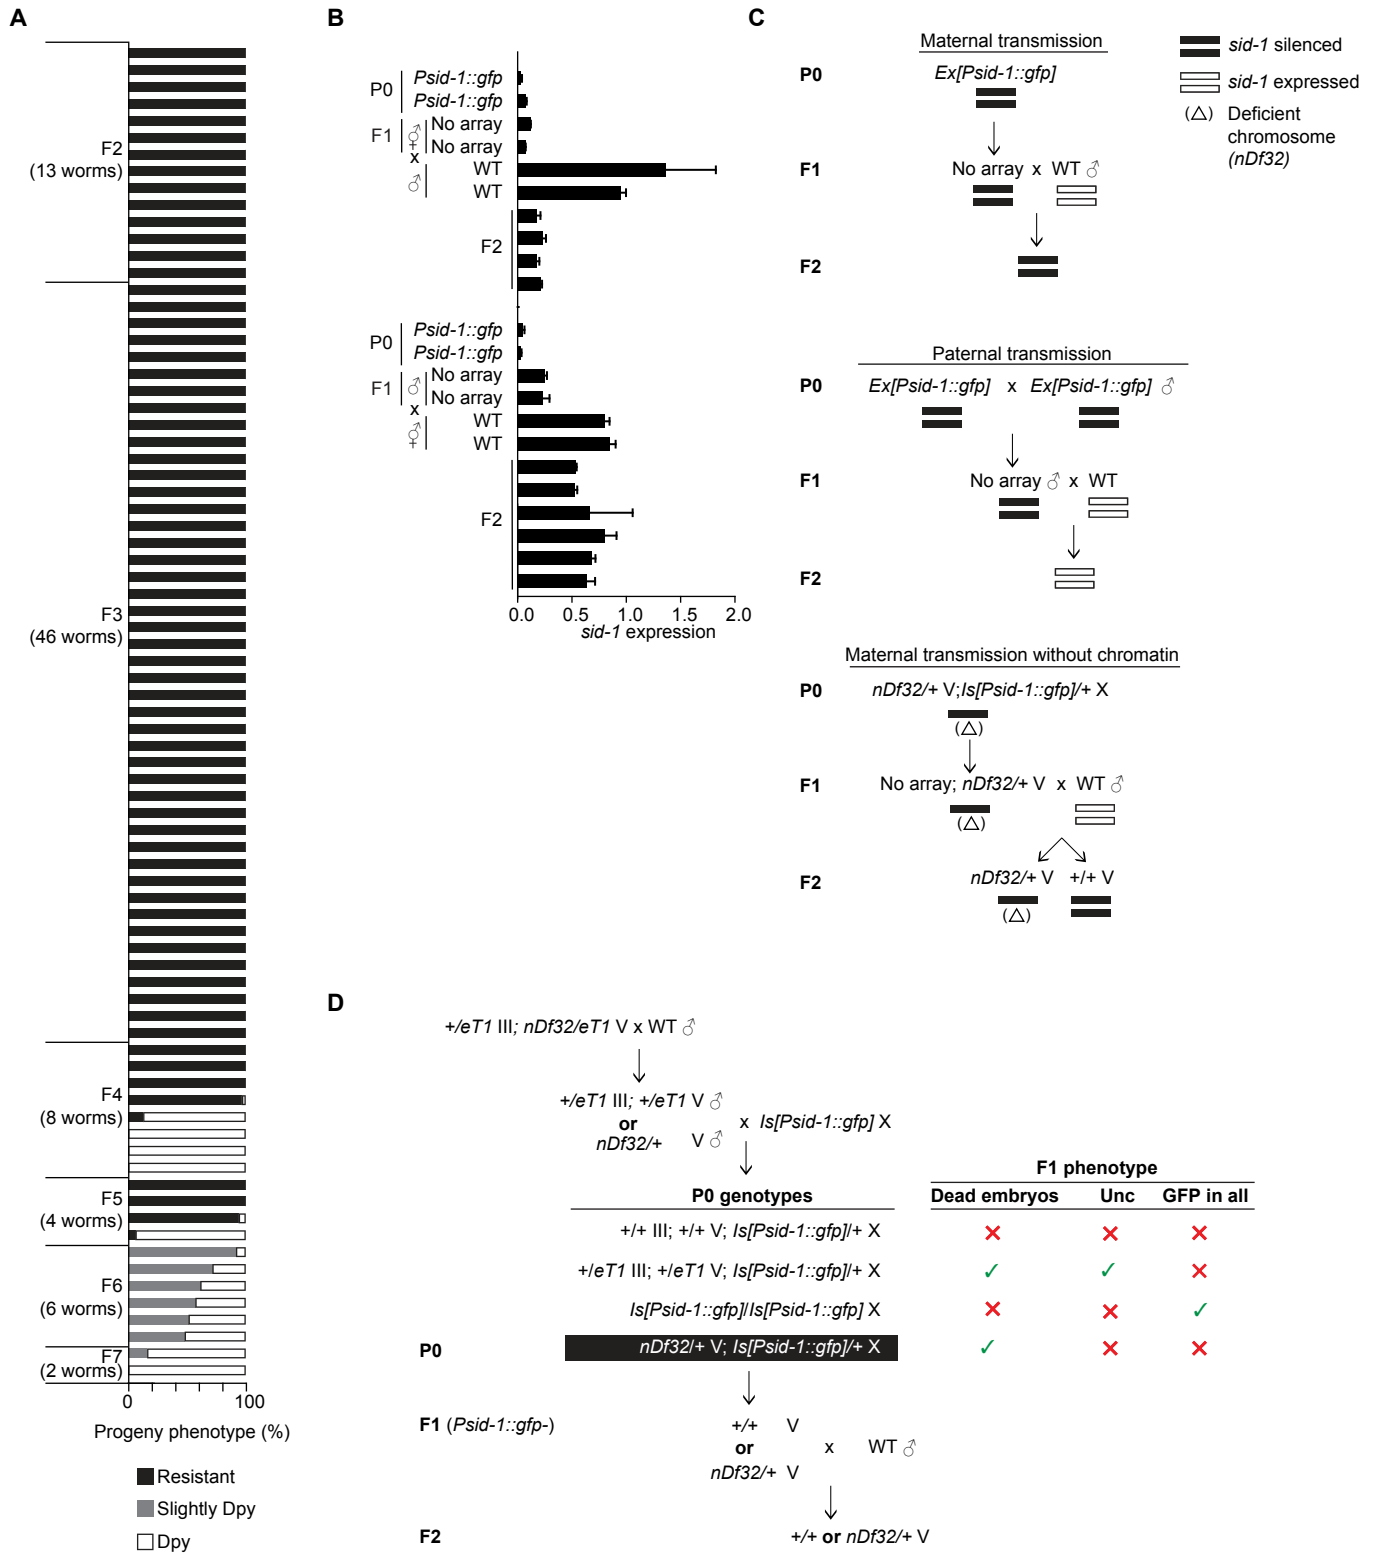

**Figure S2. Related to Figure 2. (A)** Data used to generate Figure 2B. Each bar represents the RNAi sensitivity of the adult progeny of a single L4 worm fed *dpy-11* RNAi. **(B)** Data in Figure 2A, with wild-type expression values not normalized to 1.0. **(C)** Summary of Figure 2 results. **(D)**  $nDf32/+ V; Is[Psid-1::gfp]/+ X$  P0 worms (referred to as "P0" for consistency with Figure 2) are generated from described cross. Note that  $+/eT1 III; dpy-11(e224) Df32/eT1 V$  worms are referred to as  $+/eT1 III; nDf32/eT1 V$ . The genotype of P0 worms is determined by the phenotype of F1 progeny. Dead embryos result from non-complementary inheritance of *eT1* or inheritance of two *nDf32* chromosomes. The chromosome III breakpoint of the reciprocal translocation *eT1* disrupts the *unc-36* locus, thus worms that inherit both sets of translocated chromosomes are uncoordinated. F1 progeny that all contain *Psid-1::gfp* are self progeny. F1 progeny from  $nDf32/+ V; Is[Psid-1::gfp]/+ X$  P0 worms that do not contain the array are singled and crossed to wild-type males (marked by  $Is[Podr-1::rfp]$ ). Cross progeny F2 are placed on *dpy-11* RNAi food as L4 larvae and their progeny scored as adults. The genotype of F2 worms is determined by the presence of dead F3 embryos from  $nDf32/+ V$  F2s. Only F2s from the  $nDf32/+ V \times WT$   $\text{male}$  F1 cross were considered in the analysis (determined by the presence of  $nDf32/+ V$  F2s).

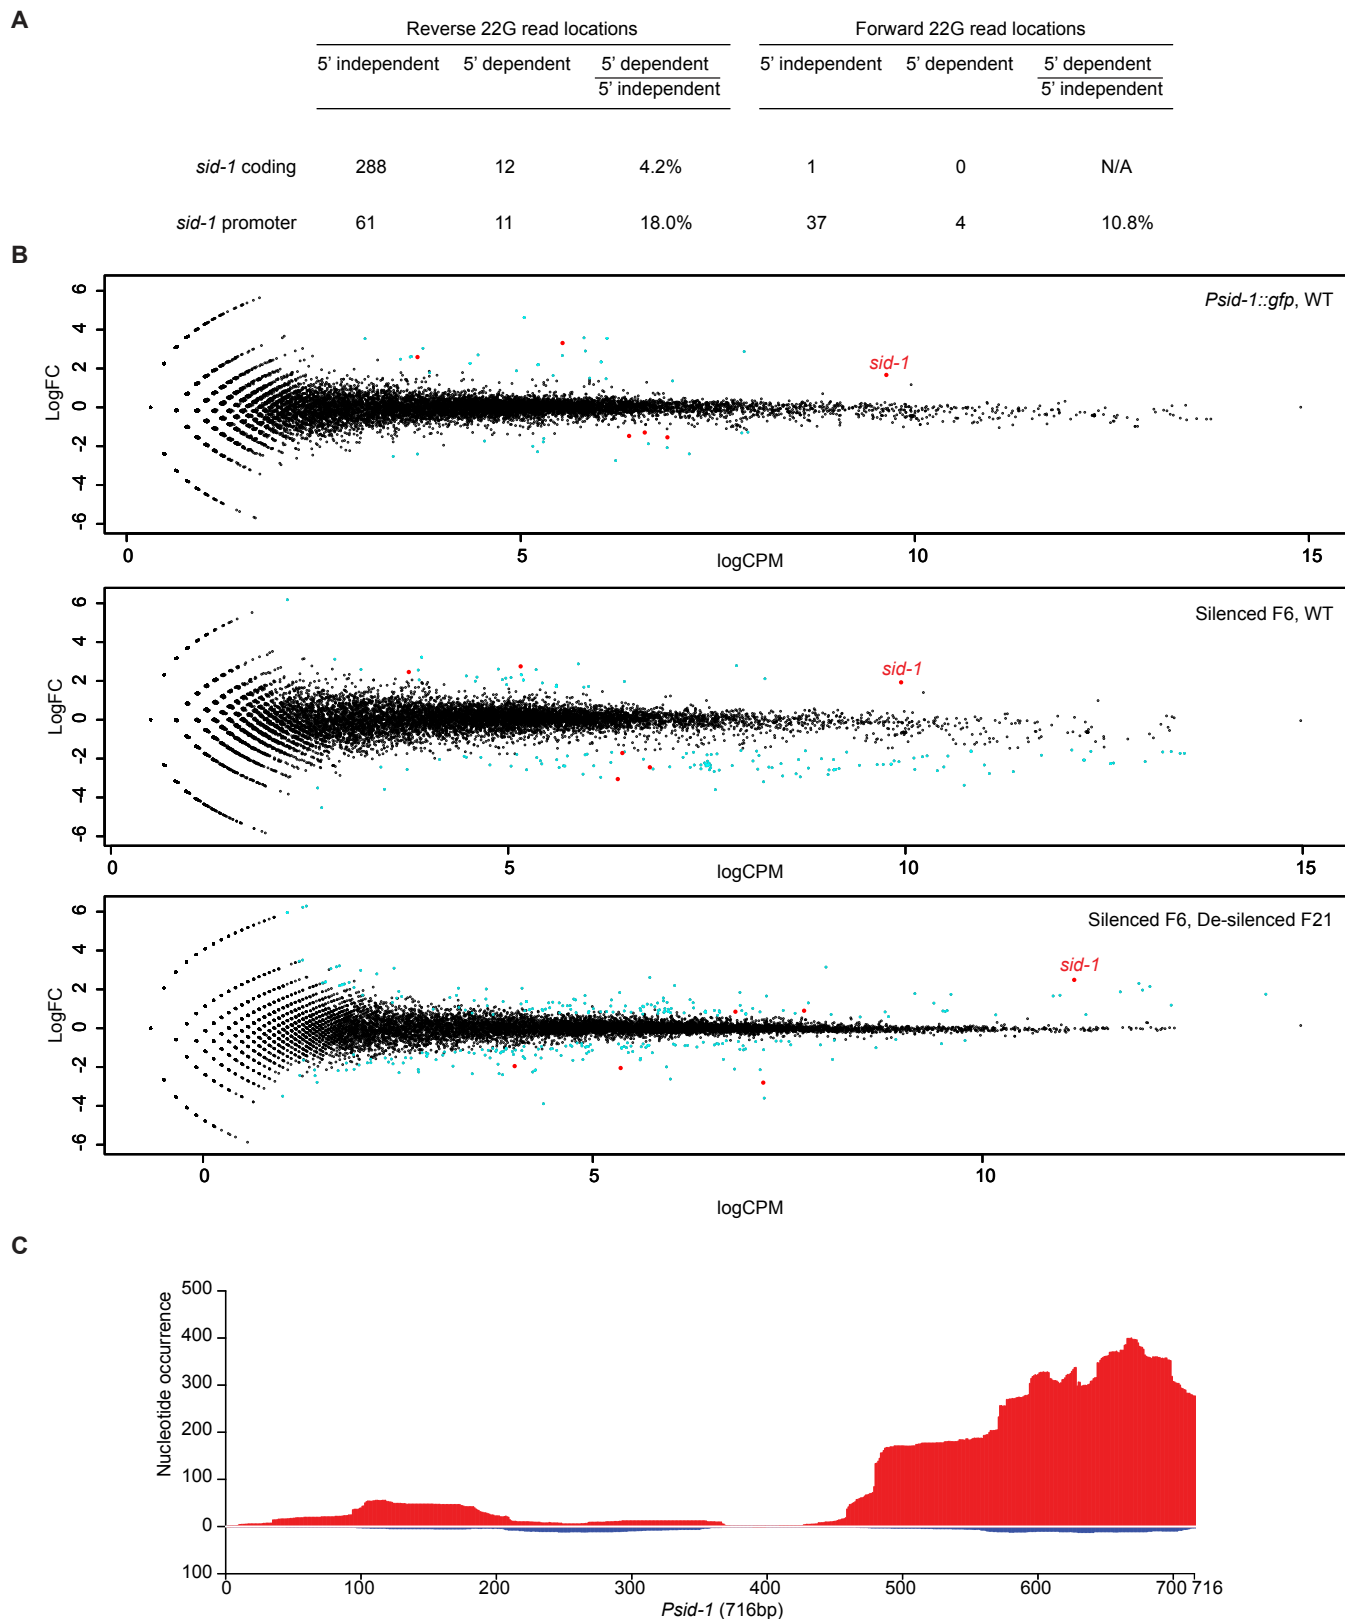

**Figure S3. Related to Figure 3. (A)** Number of locations at which 22G small RNA reads are found along *sid-1* promoter and coding region in small RNA-seq libraries prepared with (5' independent) or without (5' dependent) polyphosphatase treatment. **(B)**  $\text{Log}_2$  counts per million (CPM) vs.  $\text{Log}_2$  fold change (FC) for pairs of small RNA-seq libraries. Genes with significant ( $p < 0.05$ ) differences in aligned small RNAs in blue. The six genes (including *sid-1*) with significant differences in small RNAs shared in all three comparisons in red. **(C)** RNA-seq reads from two stranded *Psid-1::gfp* libraries were aligned to *Psid-1*. Reads per nucleotide were averaged between the two libraries. Only reads that were 75 or more nucleotides and aligned perfectly to *Psid-1* were included in this analysis. Forward reads (aligning to same strand as *sid-1* RNA) are in red, reverse reads are in blue. No reads from libraries prepared from wild-type worms aligned to the *Psid-1* region.

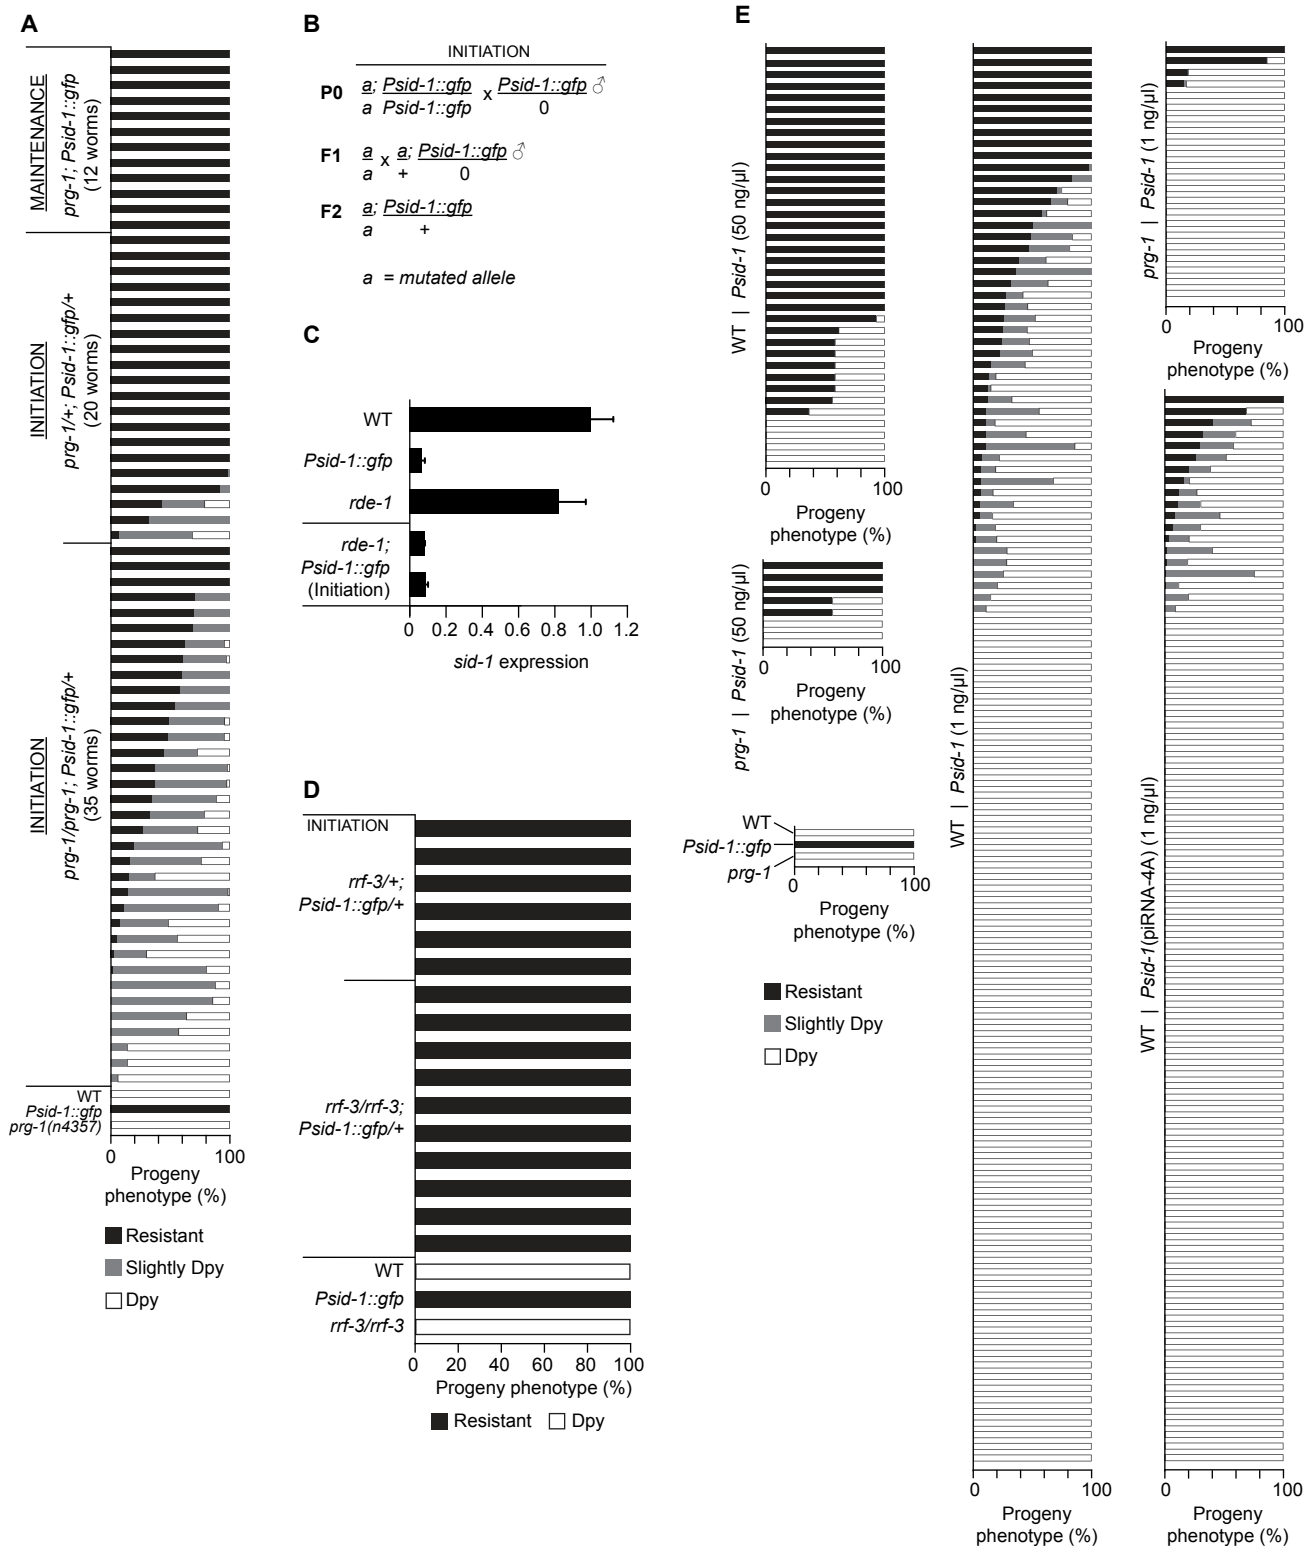

**Figure S4. Related to Figure 4.** (A) Data used to generate Figure 4C. Each bar represents the RNAi sensitivity of the adult progeny of a single L4 worm fed *dpy-11* RNAi. (B) Genetic cross used to test requirement for *rde-1* and *rrf-3* in initiation of silencing. (C) qRT-PCR analysis of *sid-1* mRNA levels in two *rde-1; Psid-1::gfp* lines made via the initiation cross and controls. Expression is measured relative to *gpd-2/3* and wild-type expression is set to 1.0. Average  $\pm$  SD of two technical replicates. (D) Feeding RNAi sensitivity of progeny of singled F2 *rrf-3/+; Psid-1::gfp/+* or *rrf-3/rrf-3; Psid-1::gfp/+* animals and controls produced by the initiation cross fed *dpy-11* RNAi as L4 larvae. >200 progeny were scored per parent. (E) Data used to generate Figure 4E. Each bar represents the RNAi sensitivity of the adult progeny of three L4 worms from each independent line fed *dpy-11* RNAi. See Table S2 for strains and alleles.

**A**

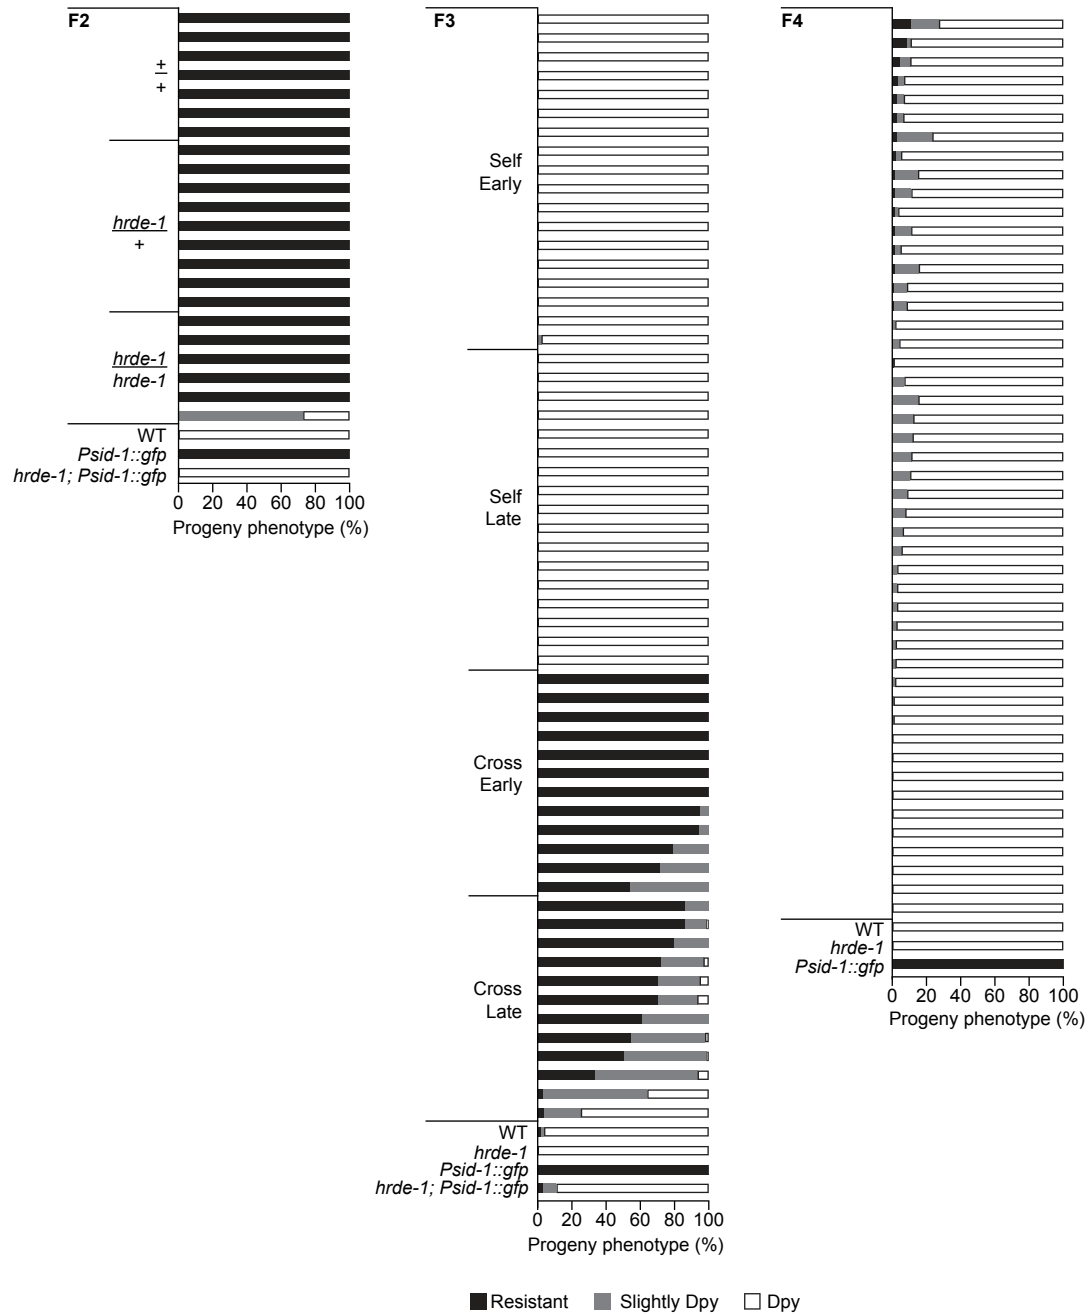

**B**

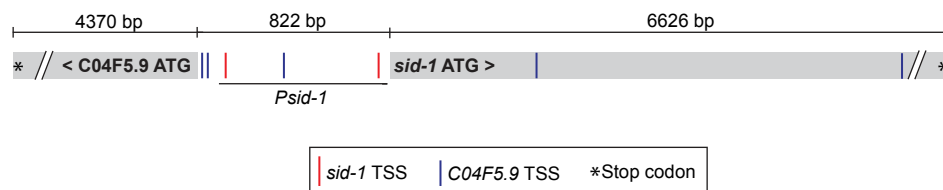

**Figure S5. Related to Figure 5. (A)** Data used to generate Figure 5. Each bar represents the RNAi sensitivity of the adult progeny of a single L4 worm fed *dpy-11* RNAi. **(B)** *sid-1* and *C04F5.9* transcription start sites (TSS) defined in Saito et al., 2013.

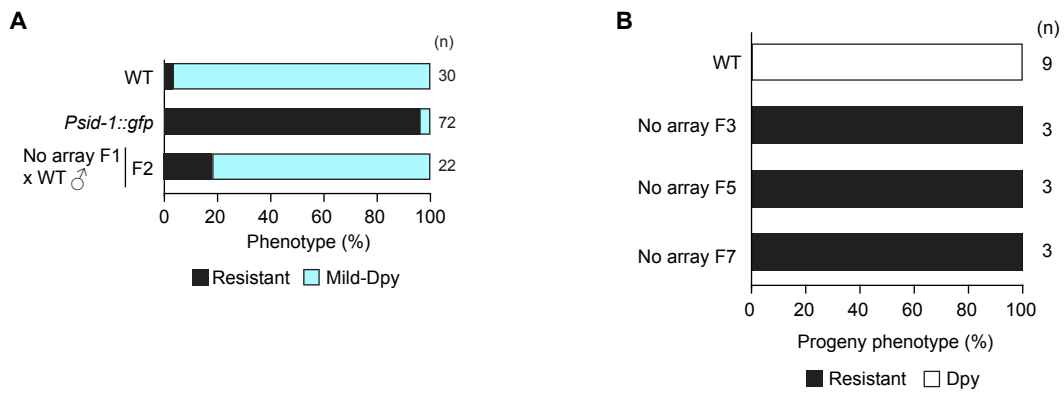

**Figure S6. Related to Figure 6. (A)** The RNAi sensitivity of (n) F2 cross progeny from described cross and controls placed on *dpy-11* RNAi food as embryos and scored as adults. **(B)** Feeding RNAi sensitivity of progeny of non-array worms of given generation, segregated from *Ex[Psid-1::gfp]* and fed *dpy-11* RNAi as (n) L4 larvae. >200 worms were scored per generation. Concurrent with experiment in Figure 6C.

**Table S1. Comparison of heritable silencing in *C. elegans*.**

|                     | <i>sid-1</i>            | <i>oma-1</i> | <i>ceh-13</i> | <i>gfp</i> | <i>gfp</i> (RNAe) | piRNA sensor                  |
|---------------------|-------------------------|--------------|---------------|------------|-------------------|-------------------------------|
| Reference:          | 1                       | 2            | 3             | 3, 4, 5    | 6                 | 7                             |
| Initiating signal   | Psid-1 multi-copy array | dsRNA        | dsRNA         | dsRNA      | piRNA             | piRNA, piRNA sensor transgene |
| Silenced locus      | <b>Endogenous</b>       | x            | x             | x          |                   |                               |
| <b>Transgene</b>    |                         |              |               | x          | x                 | x                             |
| Stability           | F13                     | F4           | "Indefinite"  | >F80       | $\infty$          | >F12                          |
| Requires selection? | <b>Yes</b>              |              | x             | x          |                   |                               |
| <b>No</b>           | x                       |              |               |            | x                 | x                             |
| Transmission        | <b>Oocyte</b>           | x            | x             | x          | x                 | x                             |
| <b>Sperm</b>        |                         | x            | ND            | ND         | x                 | ND                            |
| Tissue expression   | <b>Germline</b>         | x            | x             | x          | x                 | x                             |
| <b>Soma</b>         | x                       |              | x             |            |                   |                               |

1. This paper
2. Alcazar et al., 2008
3. Vastenhouw et al., 2006
4. Ashe et al., 2012
5. Buckley et al., 2012
6. Shirayama et al., 2012
7. Sapetschnig et al., 2015

ND: Not determined.

**Table S2. Related to STAR Methods. Strains used in this study.**

| <b>Strain</b> | <b>Genotype</b>                                                                                       | <b>Reference</b>                   |
|---------------|-------------------------------------------------------------------------------------------------------|------------------------------------|
| HC125         | <i>qtIs6[Psid-1::NLS::gfp::unc-54 3' UTR] X</i><br>Referred to as " <i>qtIs6[Psid-1::gfp]</i> " below | Winston et al., 2002               |
| HC83          | <i>qtEx6[Psid-1::NLS::gfp::unc-54 3' UTR, pRF4]</i>                                                   | Winston et al., 2002               |
| WM27          | <i>rde-1(ne219) V</i>                                                                                 | Tabara et al., 1999                |
| HC971         | <i>rde-1(ne219) V; qtIs6[Psid-1::gfp] X</i>                                                           | This paper                         |
| HC1011        | <i>rde-4(ne301) III</i>                                                                               | Tabara et al., 1999 and this paper |
| HC1012        | <i>rde-4(ne301) III; qtIs6[Psid-1::gfp] X</i>                                                         | This paper                         |
| GR1373        | <i>eri-1(mg366) IV</i>                                                                                | Kennedy et al., 2004               |
| HC1004        | <i>eri-1(mg366) IV; qtIs6[Psid-1::gfp] X</i>                                                          | This paper                         |
| HC888         | <i>rrf-3(pk2042) II</i>                                                                               | Sijen et al., 2001 and this paper  |
| HC999         | <i>rrf-3(pk2042) II; qtIs6[Psid-1::gfp] X</i>                                                         | This paper                         |
| YY186         | <i>nrde-2(gg91) II</i>                                                                                | Guang et al., 2010                 |
| HC972         | <i>nrde-2(gg91) II; qtIs6[Psid-1::gfp] X</i>                                                          | This paper                         |
| HC981         | <i>nrde-3(gg66) X</i>                                                                                 | Guang et al., 2008 and this paper  |
| HC979         | <i>nrde-3(gg66); qtIs6[Psid-1::gfp] X</i>                                                             | This paper                         |
| YY538         | <i>hrde-1(tm1200) III</i>                                                                             | Buckley et al., 2012               |
| HC995         | <i>hrde-1(tm1200) III; qtIs6[Psid-1::gfp] X</i>                                                       | This paper                         |
| HC1001        | <i>mut-2(ne298) I</i>                                                                                 | Tabara et al., 1999 and this paper |
| HC1000        | <i>mut-2(ne298) I; qtIs6[Psid-1::gfp] X</i>                                                           | This paper                         |
| HC196         | <i>sid-1(qt9) V</i>                                                                                   | Winston et al., 2002               |
| CB4037        | <i>glp-1(e2141) III</i>                                                                               | Priess et al., 1987                |
| HC1040        | <i>glp-1(e2141) III; qtIs6[Psid-1::gfp] X</i>                                                         | This paper                         |
| HC1038        | <i>set-32(ok1457) I; set-25(n5021) III</i>                                                            | This paper                         |
| HC1039        | <i>set-32(ok1457) I; set-25(n5021) III; qtIs6[Psid-1::gfp] X</i>                                      | This paper                         |
| SX922         | <i>prg-1(n4357) I</i>                                                                                 | Bagijn et al., 2012                |
| PY2417        | <i>oyIs44[Podr-1::rfp] V</i>                                                                          | Lanjuin et al., 2003               |
| MT2583        | <i>dpy-11(e224) nDf32 V/eT1(III;V)</i>                                                                | Park and Horvitz, 1986             |
| HC992         | <i>prg-1(n4357) I; qtIs6[Psid-1::gfp] X</i>                                                           | This paper                         |
|               | <i>Ex[Psid-1, pHC183 (myo3::dsRed2)]</i>                                                              | This paper                         |
|               | <i>prg-1(n4357) I; Ex[Psid-1, pHC183 (myo3::dsRed2)]</i>                                              | This paper                         |
|               | <i>Ex[Psid-1(piRNA-4A), pHC183 (myo3::dsRed2)]</i>                                                    | This paper                         |



Table S3. Related to STAR Methods. Primers used for qRT-PCR and cloning injection constructs.

| qRT-PCR primers (5' → 3')              |                                                                                                                                                                                                                          |
|----------------------------------------|--------------------------------------------------------------------------------------------------------------------------------------------------------------------------------------------------------------------------|
| <i>sid-1</i> mRNA                      | CGAAGGCTAAACTTTGTGGAGC<br>GAGTAGCAGGCATGGCTTG                                                                                                                                                                            |
| <i>gpd-2/3</i> mRNA                    | CTCTGGAGCCGACTATGTC<br>CGTACTTCTCGTGGTTGACTC                                                                                                                                                                             |
| <i>gpd-2/3</i> mRNA (single worm only) | GGAGGAGCCAAGAAGGTCATC<br>CGTACTTCTCGTGGTTGACTC                                                                                                                                                                           |
| <i>C04F5.9</i> mRNA                    | GACACGAAAATGAATAGTTGTCGG<br>GTCAGTTGATTACGATGAACGGG                                                                                                                                                                      |
| <i>C04F5.8</i> mRNA                    | CTCGGACTATGCTGCTCTC<br>GATTATCCTTGAAGACGTGGGC                                                                                                                                                                            |
| <i>cpf-1</i> mRNA                      | CGATGAAAACGTTGTGCGGAAG<br>CATATGCCTGAGCTGTTTCAATG                                                                                                                                                                        |
| <i>sid-1</i> intron 4                  | GCCAATTCAGTCTATGCGGG<br>CGACACAAGCTCTATAGTAGCC                                                                                                                                                                           |
| <i>sid-1</i> intron 6                  | GCTCACTTGTCATTTGGGGG<br>GGCAAAACGGGAAATTACCG                                                                                                                                                                             |
| <i>cpf-1</i> intron 5                  | GCGTCGAAGAGTGTTTCTAAAAAATC<br>CATTATGATATTCTTACTTCGCTCTCG                                                                                                                                                                |
| Cloning primers (5' → 3')              |                                                                                                                                                                                                                          |
| <i>Psid-1</i>                          | GGTCATGAGAGGGTCGAGAG<br>GGAAAAATGAGGAGTTTTAATTC                                                                                                                                                                          |
| <i>Psid-1(piRNA-4A)</i>                | Site directed mutagenesis:<br>AAATTTTCAGCTTAATATAAGTATTAATTCATAAAAAAATCAGAAGAAAAACAG<br>ATGAATTTAATACTTATATTAAGCTGAAAATTTTTTAAAAGATATATAGAGGATG<br><br>Amplification:<br>GGTCATGAGAGGGTCGAGAG<br>GGAAAAATGAGGAGTTTTAATTC |
